# Supplementary material for: Mesenchymal Stem Cell Exosomes as Immunomodulatory Therapy for Corneal Scarring
Source: MDPI journal article supplement (doi:10.3390/ijms24087456), 2023-04-18
Supplement: s1 [file s1]

**Table S2.** Cytokine and chemokine concentrations (in ng/mg) in non-treated and MSC-exo-treated corneas.

|               | Day 2            |                    |                    |                                 | Day 5          |                   |                   |                                 |
|---------------|------------------|--------------------|--------------------|---------------------------------|----------------|-------------------|-------------------|---------------------------------|
|               | Control          | PBS                | MSc-Exo            | p value<br>(PBS vs.<br>MSc-Exo) | Control        | PBS               | MSc-Exo           | p value<br>(PBS vs.<br>MSc-Exo) |
| IL-1 $\beta$  | 7.3 $\pm$ 2.1    | 301.8 $\pm$ 145.8  | 138.3 $\pm$ 63.4   | 0.016                           | 4.0 $\pm$ 0.5  | 116.5 $\pm$ 22.5  | 87.8 $\pm$ 30.3   | 0.183                           |
| IL-8          | 0.5 $\pm$ 0.1    | 64.0 $\pm$ 13.2    | 36.0 $\pm$ 13.3    | 0.002                           | 0.6 $\pm$ 0.1  | 24.0 $\pm$ 23.8   | 21.5 $\pm$ 12.0   | 0.854                           |
| TNF- $\alpha$ | 1.8 $\pm$ 1.1    | 4.3 $\pm$ 1.9      | 2.7 $\pm$ 1.2      | 0.042                           | 0.7 $\pm$ 0.1  | 3.2 $\pm$ 0.9     | 2.7 $\pm$ 0.8     | 0.305                           |
| IL-10         | 0.7 $\pm$ 0.4    | 2.1 $\pm$ 1.8      | 3.2 $\pm$ 1.5      | 0.039                           | 0.6 $\pm$ 0.1  | 1.7 $\pm$ 0.9     | 1.8 $\pm$ 0.7     | 0.941                           |
| CXCL1         | 62.7 $\pm$ 18.4  | 1031.3 $\pm$ 268.9 | 1001.1 $\pm$ 216.0 | 0.809                           | 60.3 $\pm$ 9.3 | 832.5 $\pm$ 164.0 | 671.3 $\pm$ 110.3 | 0.020                           |
| $\alpha$ -MPO | 127.0 $\pm$ 37.3 | 273.4 $\pm$ 48.3   | 278.7 $\pm$ 19.3   | 0.186                           | 94.1 $\pm$ 9.6 | 253.1 $\pm$ 22.6  | 214.3 $\pm$ 27.4  | 0.001                           |
