# Supplementary material for: Mesenchymal Stem Cell Exosomes as Immunomodulatory Therapy for Corneal Scarring
Source: MDPI journal article supplement (doi:10.3390/ijms24087456), 2023-04-18
Supplement: s1 [file s1]

**Table S1.** The number of rats used in experiments.

| <b>Experiment</b>                                                        | <b>Treatment group</b> |                       |
|--------------------------------------------------------------------------|------------------------|-----------------------|
|                                                                          | <b>Epithelium-on</b>   | <b>Epithelium-off</b> |
| Time-lapse exosome tracing                                               | 5                      | 5                     |
|                                                                          |                        |                       |
|                                                                          | <b>PBS</b>             | <b>MSC-exo</b>        |
| Corneal neovascularization assay                                         | 5                      | 5                     |
| Whole-mount COL3A1, FN, and $\alpha$ -SMA immunofluorescence staining*   | 3                      | 3                     |
| Frozen section CD80, CD86, CD163, and CD206 immunofluorescence staining* | 3                      | 3                     |
| RT-PCR of M1 and M2 macrophage markers*                                  | 3 x 3 = 9              | 3 x 3 = 9             |
| ELISA and multiplex of cytokines/chemokines on day 2*                    | 3 x 3 = 9              | 3 x 3 = 9             |
| ELISA and multiplex of cytokines/chemokines on day 5*                    | 3 x 3 = 9              | 3 x 3 = 9             |

\*Naïve corneas of the fellow eyes were used as controls
